# Supplementary material for: Cyfip2 controls the acoustic startle threshold through FMRP, actin polymerization, and GABAB receptor function
Source: PubMed Central journal article supplement — bioRxiv. 2024 Feb 5:2023.12.22.573054. Originally published 2023 Dec 22. Preprint. [Version 2] doi: 10.1101/2023.12.22.573054 (PMC10769380; doi:10.1101/2023.12.22.573054), 2024-02-05
Supplement: media-1.pdf [file media-1.pdf]

1 **Supporting Information for Deslauriers et al., 2023**

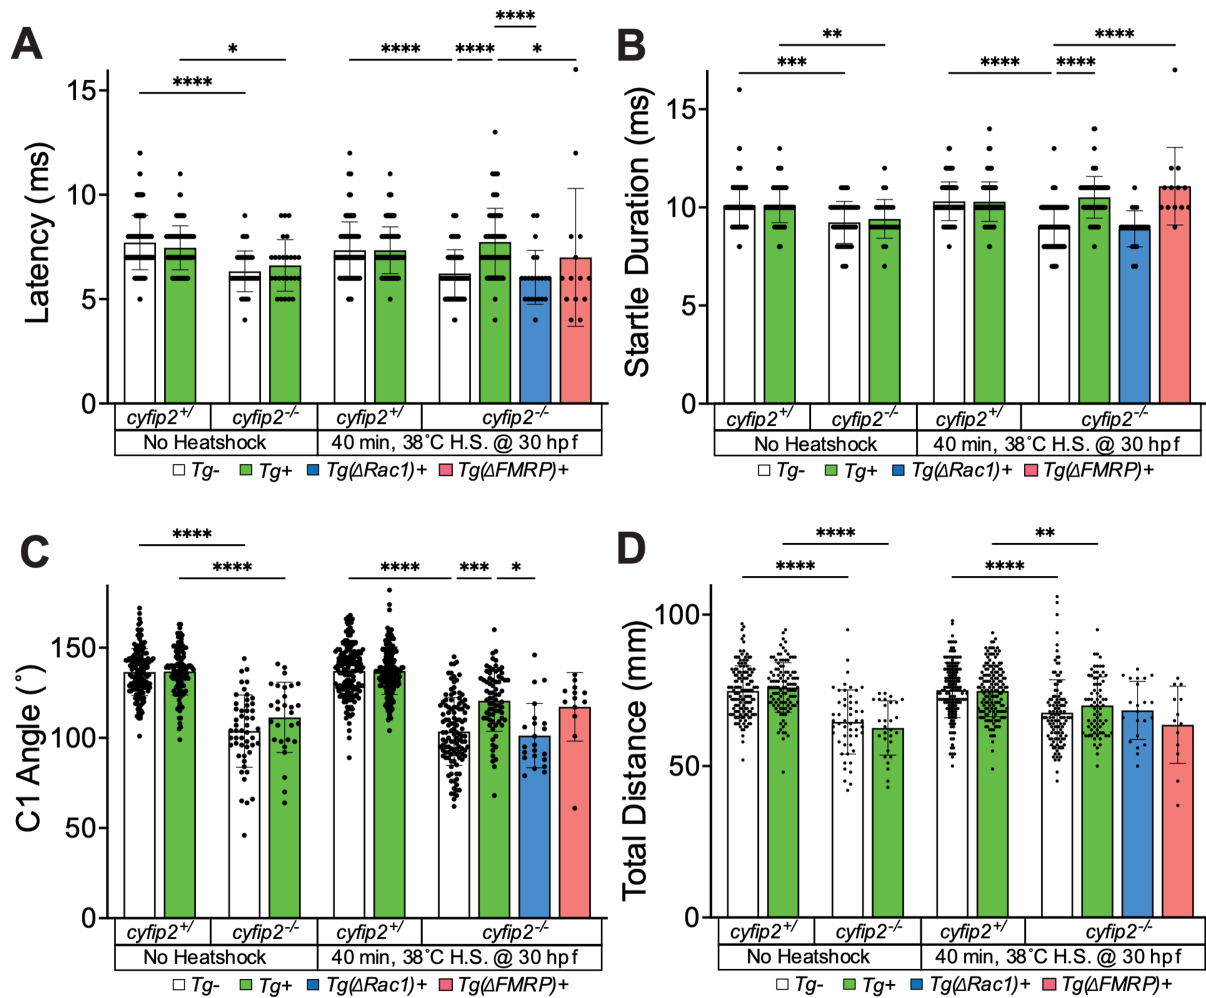

2  
3

4 **Figure S1. Restoring *Cyfip2* at 30 hpf rescues startle latency and duration phenotypes in *cyfip2***  
 5 **mutants.** (A) Average startle latency (milliseconds; ms) of larvae shown in Figure 1 at 53.6 dB for *cyfip2*  
 6 sibling (+/) and mutant (+/+) larvae expressing either normal (*Tg*+; green), *Rac1*- ( $\Delta$ *Rac1*+; blue) or  
 7 *FMRP*/*eIF4E*- ( $\Delta$ *FMRP*+; pink) binding deficient versions of *Cyfip2*-EGFP. Comparisons were made to  
 8 both non-transgenic (*Tg*-) and non-heatshocked controls. All indices (mean  $\pm$  SD) compared using a  
 9 Kruskal-Wallis test with Dunn's multiple comparisons correction;  $p^* < 0.05$ ;  $p^{****} < 0.0001$ . (B) Average  
 10 startle duration (ms) of larvae shown in Figure 1 at 53.6 dB. Comparisons made as previously.  $p^{**} < 0.01$ ;  
 11  $p^{***} < 0.001$ ;  $p^{****} < 0.0001$ . (C) Average initial turn (C1) angle (degrees) of larvae shown in Figure 1 at  
 12 53.6 dB. Comparisons made as previously.  $p^* < 0.05$ ;  $p^{***} < 0.001$ ;  $p^{****} < 0.0001$ . (D) Total distance  
 13 traveled (mm) of larvae shown in Figure 1 at 53.6 dB. Comparisons made as previously.  $p^{**} < 0.01$ ;  $p^{****}$   
 14  $< 0.0001$ .

15

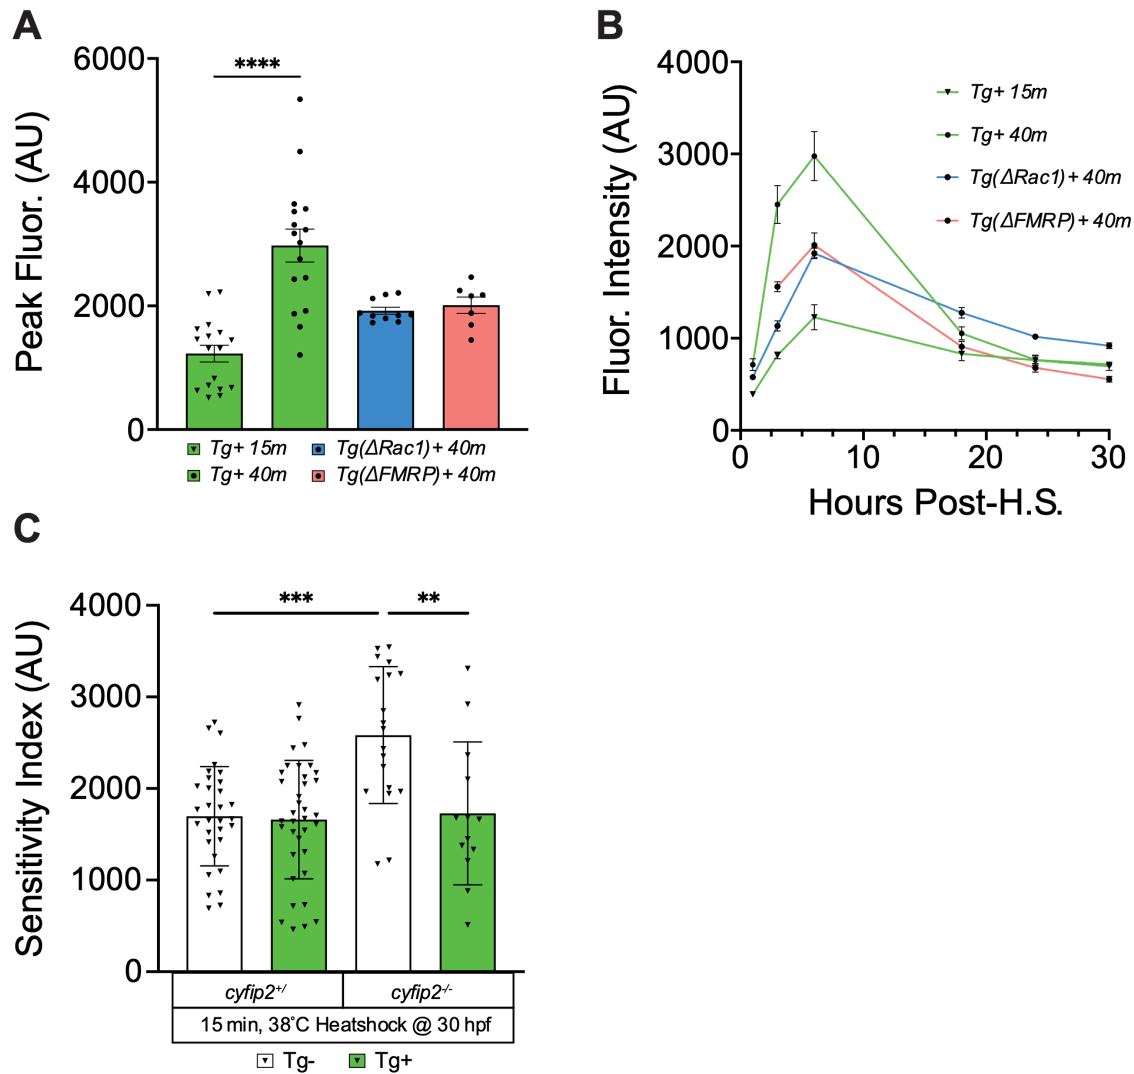

16

17 **Figure S2. Rac1 and FMRP/eIF4E interactions are critical to establishing the innate acoustic startle**  
 18 **threshold.** (A) Peak fluorescence, at approximately 6 hours post-heatshock of *Tg(hsp70:cyfip2-EGFP)+*,  
 19 *Tg(hsp70:cyfip2-(Δ*Rac1*)-EGFP)+*, and *Tg(hsp70:cyfip2-(Δ*FMRP*)-EGFP)+* larvae following either a 15- or  
 20 40-minute, 38°C heatshock at 30 hpf. Measurements taken correspond to body specific expression,  
 21 excluding saturating transgenic expression in the eye and auto fluorescence in the yolk sac, using FIJI  
 22 image analysis software on lateral view images at the 6-hour post heatshock time point. *Tg+* 15 min  
 23 heatshock (green bar, filled triangles), *Tg+* 40 min heatshock (green bar, filled circles), *Tg(Δ*Rac1*)*+ 40  
 24 min heatshock (blue bar, filled circles), and *Tg(Δ*FMRP*)*+ 40 min heatshock (pink bar, filled circles). Peak  
 25 fluorescence values (mean ± SEM) were compared using a Kruskal-Wallis test with Dunn's multiple  
 26 comparisons correction;  $p^{****} < 0.0001$ . (B) Fluorescence intensity (mean ± SEM) of *Tg(hsp70:cyfip2-*  
 27 *EGFP)+*, *Tg(hsp70:cyfip2-(C179R)-EGFP)+*, and *Tg(hsp70:cyfip2-(K723E)-EGFP)+* larvae following  
 28 either a 15- or 40-minute, 38°C heatshock at 30 hpf. Measurements taken as in S2A at 1, 3, 6-, 18-, 24-,  
 29 and 30-hours post heatshock. Colors as in S2A. (C) Sensitivity indices for 5 dpf *cyfip2* sibling (+/-) and  
 30 mutant (-/-) larvae, following a 15-minute heatshock at 30 hpf to express normal (*Tg+*) Cyfip2-EGFP.  
 31 Comparisons were made both between transgene conditions and between genotypes. All indices (mean ±  
 32 SD) compared using a Kruskal-Wallis test with Dunn's multiple comparisons correction;  $p^{**} < 0.01$ ;  $p^{***} <$   
 33 0.001.  
 34

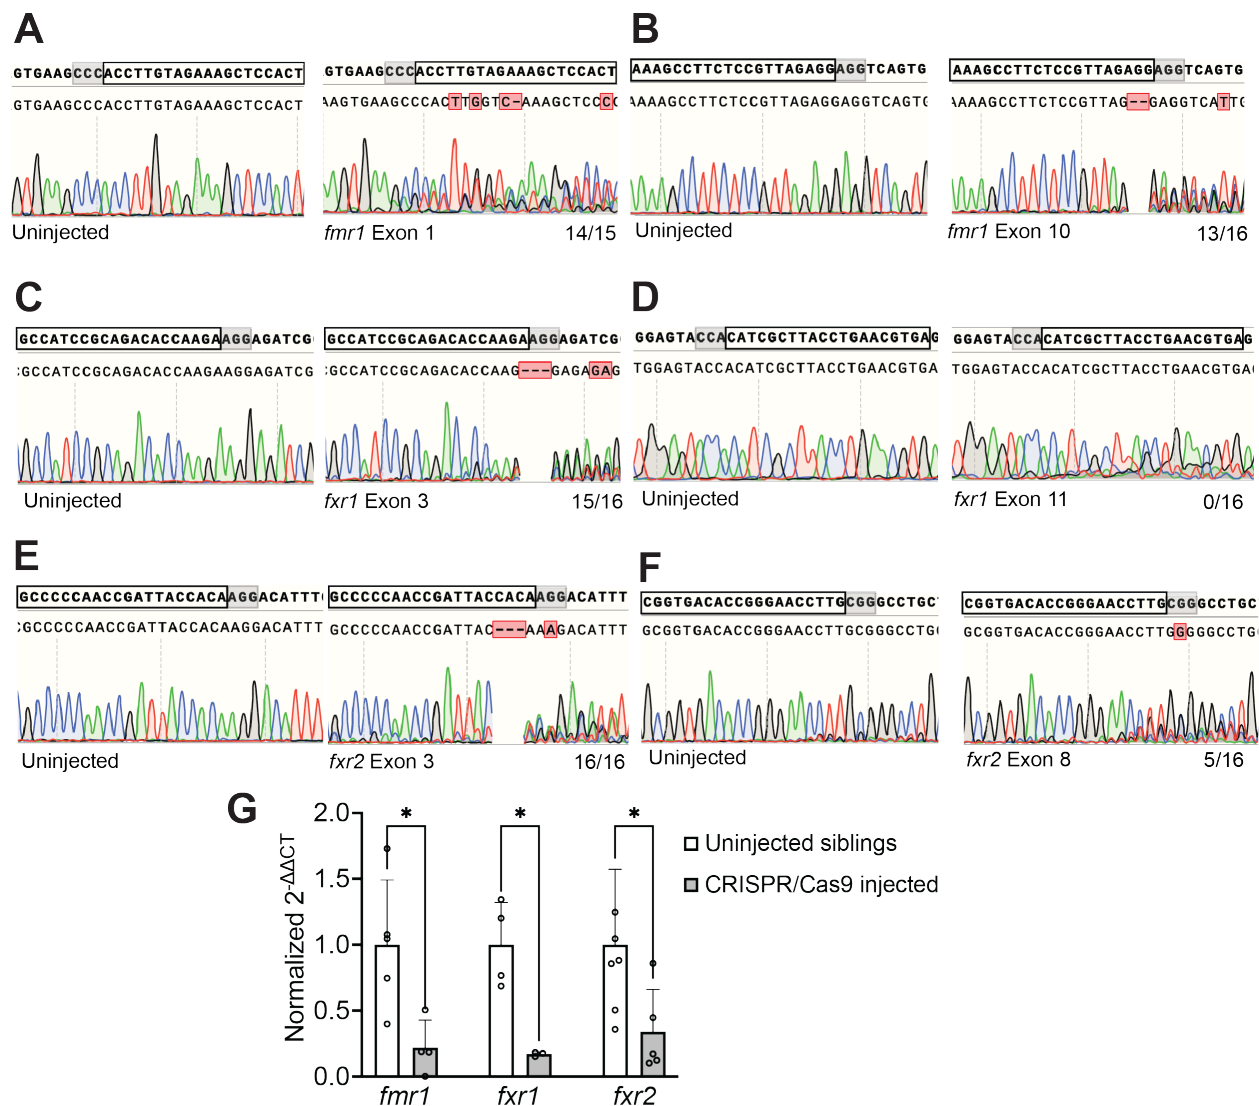

35

36 **Figure S3. FMR1, FXR1 and FXR2 CRISPR gRNAs induce mutations at their target sites.** Sanger  
 37 sequencing chromatogram results for uninjected and CRISPR/Cas9-injected sibling larvae. Target site  
 38 outlined above each chromatogram by black box, PAM site highlighted in gray, and fractions indicated  
 39 editing efficiency (# of individuals with edits / total # analyzed). (A) *fmr1* exon 1 target site, (B) *fmr1* exon  
 40 10 target site, (C) *fxr1* exon 3 target site, (D) *fxr1* exon 11 target site, (E) *fxr2* exon 3 target site, (F) *fxr2*  
 41 exon 8 target site. (G) qPCR results showing knockdown of *fmr1*, *fxr1*, and *fxr2* in CRISPR/Cas9-injected  
 42 larvae compared to uninjected siblings.

43

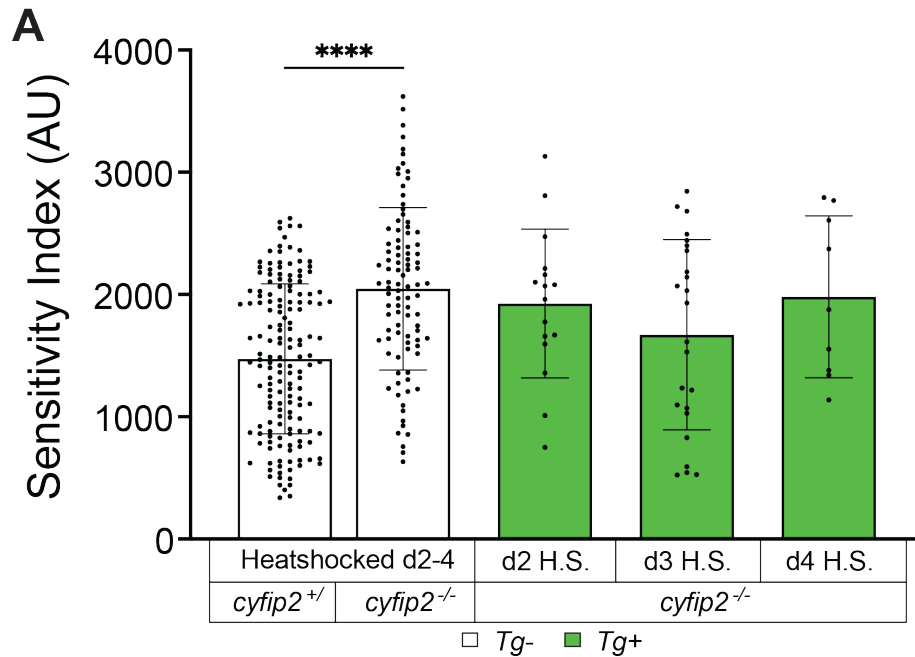

44

45 **Figure S4. Cyfip2 fails to rescue mutant hypersensitivity when expressed after 30 hpf. (A)**  
 46 Sensitivity indices for 5 dpf *cyfip2* sibling (+/) and mutant (-/-) larvae, following a 40-minute, 38°C  
 47 heatshock at 2, 3 or 4 dpf to express normal (*Tg*+) Cyfip2-EGFP. Comparisons were made both between  
 48 genotypes, and within genotype by condition. All indices (mean ± SD) compared using a Kruskal-Wallis  
 49 test with Dunn's multiple comparisons correction; p\*\*\*\* < 0.0001.

50

51

52

53

54

55

56

57

58

59

60

61

62

63

64

65

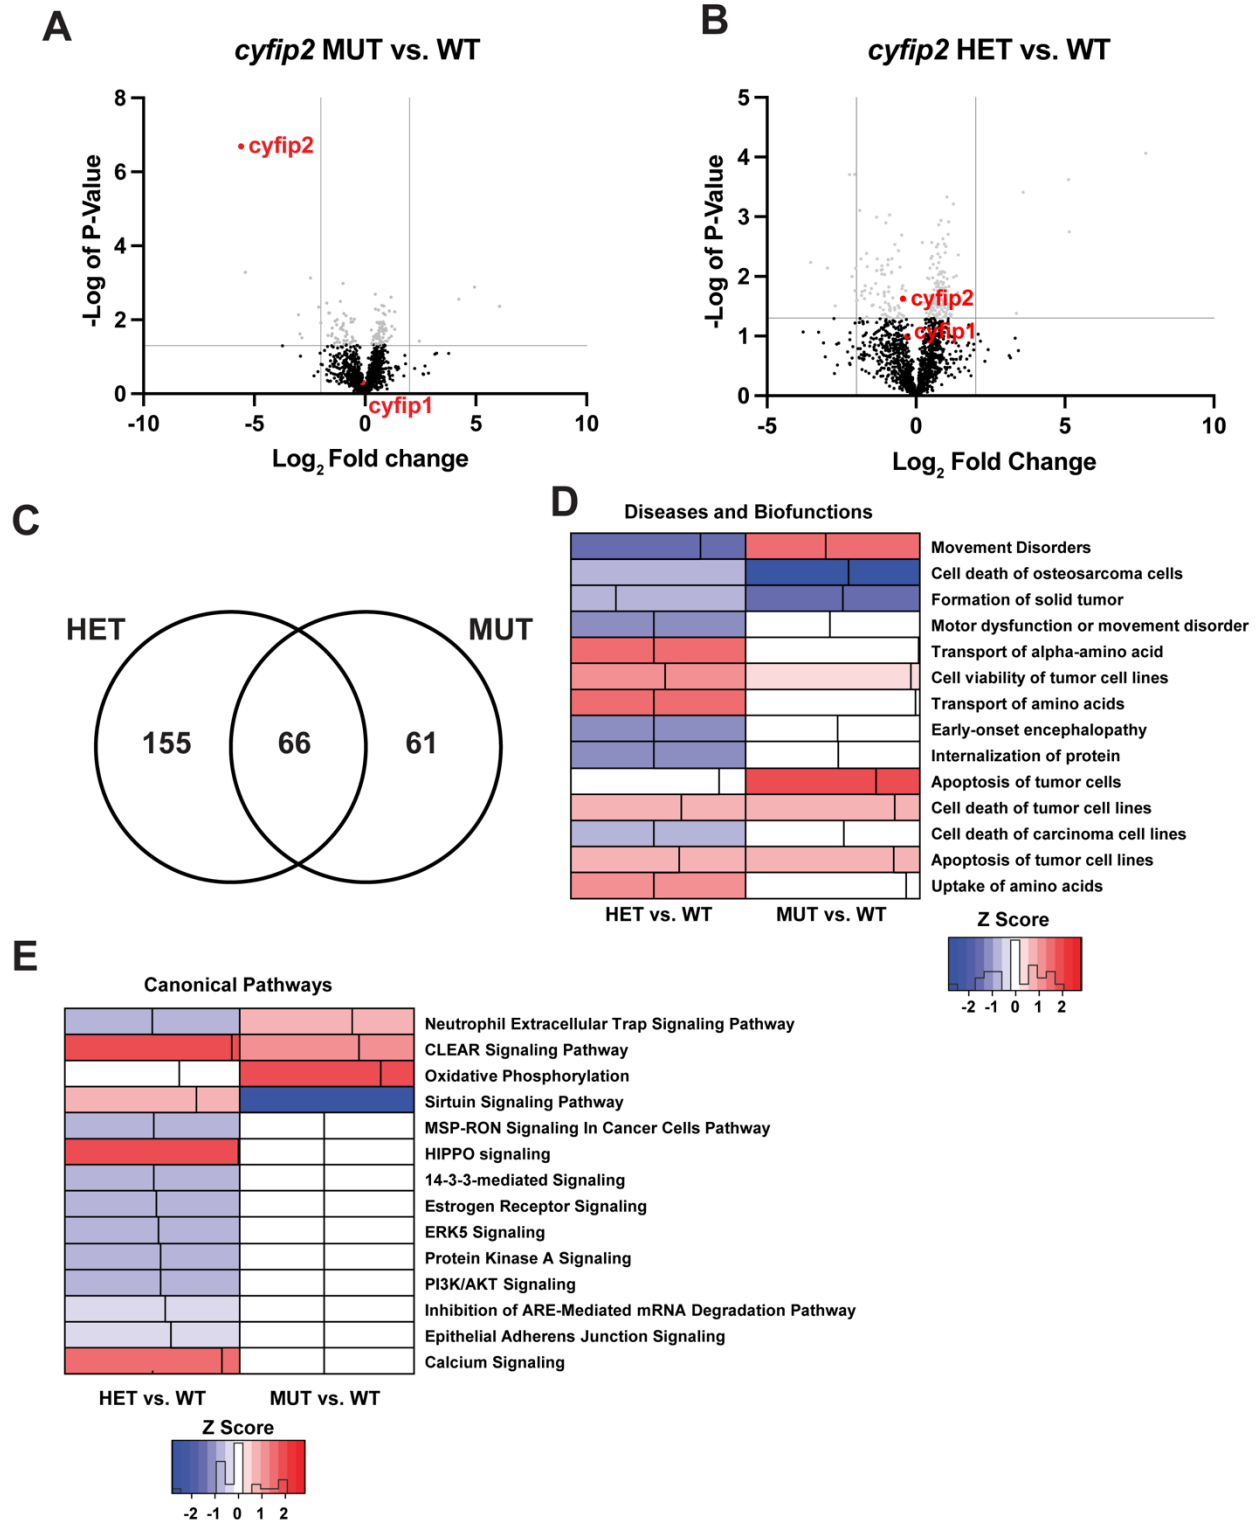

66

67 **Figure S5. Loss of Cyfip2 causes substantial changes to the proteome.** (A-B) Volcano plot  
 68 highlighting the differentially expressed proteins (DEPs) in *cyfip2* mutants (A) and heterozygotes (B)  
 69 compared to wildtypes. Gray dots indicate the significantly dysregulated proteins ( $p \leq 0.05$ ) while the  
 70 black dots represent non-significantly ( $p \geq 0.05$ ) regulated proteins compared to the control group (*cyfip2*  
 71 wildtype). Red dots highlight Cyfip1 and Cyfip2 proteins. (C) Venn diagram shows the overlap of DEPs

72 between both genotype groups. (D-E) Heat map displaying the impacted diseases and biological  
 73 functions (D) and canonical pathways (E) identified using IPA to compare *cyfip2* heterozygotes (HET) and  
 74 mutants (MUT) to wildtypes (WT). The red- or blue-colored rectangles indicate the z-score activities,  
 75 where red shading indicates predicted activation and blue shading indicates predicted inhibition.  
 76

77

78

79

80

81 **Table S1. Non-branched actin regulation does not influence acoustic startle regulation.**

| Compound  | Concentration (μM) | Incubation Period             |                                |                                         |                             |                             |
|-----------|--------------------|-------------------------------|--------------------------------|-----------------------------------------|-----------------------------|-----------------------------|
|           |                    | 30 min.                       | 1 hr.                          | 16 hr.                                  |                             |                             |
| SMIFH2    | 1                  | 79% of Control, p > 0.99      | 110.13% of Control, p > 0.99   | 97.53% of Control, p > 0.99             |                             |                             |
|           | 5                  | 69.45% of Control, p = 0.1598 | 109.36% of Control, p > 0.99   | <b>Lethal</b>                           |                             |                             |
| IPA-3     | 20                 | 75.64% of Control, p = 0.5816 | 134.28% of Control, p = 0.3003 | <b>Lethal</b>                           |                             |                             |
|           | 50                 | 82.92% of Control, p > 0.99   | 147.04% of Control, p = 0.2631 | <b>Lethal</b>                           |                             |                             |
| GSK429286 | 100                | 93.11% of Control, p > 0.99   | -                              | <b>62.37% of Control, p*** = 0.0003</b> |                             |                             |
|           |                    |                               |                                | <b><i>cyfip2(+/+)</i></b>               | <b><i>cyfip2(+/-)</i></b>   | <b><i>cyfip2(-/-)</i></b>   |
|           |                    |                               |                                | 62.23% of Control, p = 0.6254           | 78.17% of Control, p > 0.99 | 76.31% of Control, p > 0.99 |

82 Startle indices comparisons for all tested concentrations and incubation periods of non-branched actin  
 83 nucleation (SMIFH2) and actin severing pathway antagonists (IPA-3; GSK429286). Significant differences  
 84 ( $p < 0.05$ ) between treatment groups and controls are listed (**bold**), using a Kruskal-Wallis test with  
 85 Dunn's multiple comparisons correction.

86

87  
88  
89

**Table S2. Cyfip2-dependent branched actin polymerization regulates the acoustic startle threshold.**

| Compound | Concentration ( $\mu\text{M}$ ) | Incubation Period (30 minutes)                |                                                   |
|----------|---------------------------------|-----------------------------------------------|---------------------------------------------------|
|          |                                 | <i>cyfip2</i> <sup>+/+</sup>                  | <i>cyfip2</i> <sup>p400</sup>                     |
| CK-666   | 5                               | 58.42% of DMSO control, p > 0.99              | 110.49% of DMSO control, p > 0.99                 |
|          | 10                              | 78.97% of DMSO control, p > 0.99              | 120.27% of DMSO control, p > 0.99                 |
|          | 20                              | 128.33% of DMSO control, p > 0.99             | 154.19% of DMSO control, p = 0.3823               |
|          | 35                              | 165.57% of DMSO control, p = 0.7021           | 203.72% of DMSO control, p = 0.1073               |
|          | 50                              | <b>341.10% of DMSO control, p*** = 0.0002</b> | <b>421.21% of DMSO control, p**** &lt; 0.0001</b> |
| CK-869   | 5                               | 110.31% of DMSO control, p > 0.99             | 115.61% of DMSO control, p > 0.99                 |
|          | 7.5                             | 93.81% of DMSO control, p > 0.99              | 84.02% of DMSO control, p > 0.99                  |
|          | 10                              | 180.76% of DMSO control, p = 0.6087           | <b>266.15% of DMSO control p*** = 0.0005</b>      |
|          | 20                              | 153.06% of DMSO control, p = 0.7128           | <b>289.66% of DMSO control, p**** &lt; 0.0001</b> |
|          | 35                              | <b>251.53% of DMSO control, p*** = 0.0006</b> | <b>367.73% of DMSO control, p**** &lt; 0.0001</b> |
|          | 50                              | <b>244.93% of DMSO control, p* = 0.0338</b>   | <b>339.15% of DMSO control, p**** &lt; 0.0001</b> |

90 Startle indices comparisons for all tested concentrations of Arp2/3 inhibitors (CK-666 & CK-869) used in  
91 this work. Significant differences (p < 0.05) between treatment groups and controls are listed (**bold**),  
92 using a Kruskal-Wallis test with Dunn's multiple comparisons correction.

93  
94

95 **Table S3.** Research animals/strains used in this work.

| Experimental Models                             | Origin               | ZFIN ID          |
|-------------------------------------------------|----------------------|------------------|
| Zebrafish: <i>cyfip2</i> <sup>p400</sup>        | Marsden et al., 2018 | ZDB-ALT-180305-9 |
| Zebrafish: <i>Tg(hsp70:cyfip2-EGFP)</i> line 14 | Marsden et al., 2018 | ZDB-ALT-180309-1 |
| Zebrafish: <i>Tg(hsp70:cyfip2-(C179R)-EGFP)</i> | This Paper           | ZDB-ALT-220719-3 |
| Zebrafish: <i>Tg(hsp70:cyfip2-(K723E)-EGFP)</i> | This Paper           | ZDB-ALT-220719-4 |

96  
97  
98

99 **Table S4.** Oligonucleotide Primers used in this work.

| Primers                                               | Sequence (5' -> 3')                  | Ref #                 |
|-------------------------------------------------------|--------------------------------------|-----------------------|
| rhAmp <i>cyfip2<sup>p400</sup></i> Allele Specific #1 | ACCATCTGCTACACAGGTTArUACTG           | 192743289; This Paper |
| rhAmp <i>cyfip2<sup>p400</sup></i> Allele Specific #2 | CCATCTGCTCACACAGGTTTrUACTG           | 192743288; This Paper |
| rhAmp <i>cyfip2<sup>p400</sup></i> Locus Specific     | GCTGCATTTTCATTCTCTTCTCTCTTTc<br>TCTC | 192743287; This Paper |
| <i>cyfip2<sup>p400</sup></i> dCAPS Forward            | CAAAGTCTTGCTGCGGATAAAAG              | Marsden et al., 2018  |
| <i>cyfip2<sup>p400</sup></i> dCAPS Reverse            | CTGCACCATCTGCTCACACAAATT             | Marsden et al., 2018  |
| <i>cyfip2<sup>p400</sup></i> Reverse                  | CTCTGAGCGCCAGGTCAAAC                 | This Paper            |
| GFP Forward                                           | GACGTAAACGGCCACAAGTT                 | Marsden et al., 2018  |
| GFP Reverse                                           | GAAGTCCAGCAGGACCATGT                 | Marsden et al., 2018  |
| <i>cyfip2</i> Seq1F                                   | TGGAGGTGATCCCAGGTTAT                 | This Paper            |
| <i>cyfip2</i> Seq2F                                   | GGTCTGGACAGTCAGAAGTCTGAT             | This Paper            |
| <i>cyfip2</i> Seq3F                                   | CCCCCTAATGACCCTTGTCTG                | This Paper            |
| <i>cyfip2</i> Seq4F                                   | GCCCTCACAAAATTCAAGAAGCAG             | This Paper            |
| <i>cyfip2</i> Seq5F                                   | GCCAACCACAACGTCTCTGC                 | This Paper            |
| <i>cyfip2</i> Seq6F                                   | AGAGACTCGGGACTCCACAG                 | This Paper            |
| <i>cyfip2</i> -C179R Fwd                              | GAACATGAAGcgcAGTGTA AAAAATG          | This Paper            |
| <i>cyfip2</i> -C179R Rev                              | TTCAGTTCGTCCAGCACACA                 | This Paper            |
| <i>cyfip2</i> -K723E Fwd                              | CCTCCTAGACgAACGCTTCCG                | This Paper            |
| <i>cyfip2</i> -K723E Rev                              | ACACTTCCAGCCATTGCTTT                 | This Paper            |

100  
101  
102  
103  
104  
105  
106  
107  
108  
109  
110  
111



112 **Table S5.** List of all CRISPR-Cas9 guide RNAs used in this work.

| <b>CRISPR gRNA</b> | <b>Sequence (5' -&gt; 3')</b> | <b>Target Exon</b> | <b>Ref #</b> |
|--------------------|-------------------------------|--------------------|--------------|
| <i>fmr1</i> gRNA1  | AGTGGAGCTTTCTACAAGGTGGG       | Exon 1             | This Paper   |
| <i>fmr1</i> gRNA2  | AAAGCCTTCTCCGTTAGAGGAGG       | Exon 10            | This Paper   |
| <i>fxr1</i> gRNA1  | GCCATCCGCAGACACCAAGAAGG       | Exon 3             | This Paper   |
| <i>fxr1</i> gRNA2  | TCACG TTCAGGTAAGCGATGTGG      | Exon 11            | This Paper   |
| <i>fxr2</i> gRNA1  | GCCCCAACCGATTACCACAAGG        | Exon 3             | This Paper   |
| <i>fxr2</i> gRNA2  | CGGTGACACCGGGAACCTTGCGG       | Exon 8             | This Paper   |

113

114 **Table S6.** List of all pharmacologic compounds used in this work.

| Compound                                | Molecular Target                                               | CAS #        | Manufacturer  |
|-----------------------------------------|----------------------------------------------------------------|--------------|---------------|
| CK-869                                  | Arp2/3 antagonist                                              | 388592-44-7  | Sigma-Aldrich |
| CK-666                                  | Arp2/3 antagonist                                              | 442633-00-3  | Sigma-Aldrich |
| MK-801                                  | NMDA receptor antagonist                                       | 77086-22-7   | Sigma-Aldrich |
| SMIFH2                                  | Formin antagonist                                              | 340316-62-3  | Fisher/Tocris |
| IPA-3                                   | p21-associated kinase 1 (Pak1) antagonist                      | 42521-82-4   | Fisher/Tocris |
| GSK429286                               | Rho associated coiled coil containing kinase (ROCK) antagonist | 37-261-R     | Fisher/Tocris |
| <i>N</i> -phenylanthranilic acid (NPAA) | Chloride (Cl <sup>-</sup> ) channel antagonist                 | 91-40-7      | Sigma-Aldrich |
| Meclofenamic Acid (MA)                  | Potassium (K <sup>+</sup> ) channel antagonist                 | 6385-02-0    | Sigma-Aldrich |
| Phenoxybenzamine (POBA)                 | Alpha-adrenergic receptor/calmodulin antagonist                | 62-92-3      | Sigma-Aldrich |
| Etazolate (ETAZ)                        | Phosphodiesterase 4 (PDE-4) inhibitor                          | 35838-58-5   | Sigma-Aldrich |
| NSC23766                                | Rac1 antagonist                                                | 1177865-17-6 | Fisher/Tocris |
| BMS204352                               | K <sup>+</sup> channel agonist/GABA-A receptor inhibitor       | 187523-35-9  | Sigma-Aldrich |
| Muscimol                                | GABA-A receptor agonist                                        | 2763-96-4    | Sigma-Aldrich |
| Baclofen                                | GABA-B receptor agonist                                        | 1134-47-0    | Sigma-Aldrich |

115  
 116  
 117  
 118  
 119  
 120  
 121  
 122  
 123  
 124  
 125  
 126  
 127  
 128

**Table S7.** All differentially expressed proteins for the *cyfip2* heterozygous group (HET).

| HET vs WT   |          |             |
|-------------|----------|-------------|
| Uniprot IDs | P value  | Fold change |
| A0A2R8RZ61  | 8.66E-05 | 7.71476     |
| Q7ZUM0      | 0.000196 | -2.05927    |
| E7F354      | 0.000197 | -2.2296     |
| B8A4S4      | 0.000238 | 5.11688     |
| E9QFS3      | 0.000389 | 3.59577     |
| B0R1C4      | 0.000465 | 1.03931     |
| F1QT45      | 0.000613 | 1.25343     |
| B7ZD02      | 0.000781 | -1.88612    |
| Q6DGY7      | 0.000926 | -0.88896    |
| A0A0R4IUZ8  | 0.001019 | -1.31951    |
| B8JLV7      | 0.001154 | 0.83548     |
| Q6NUT5      | 0.00122  | 1.09879     |
| Q7ZTS3      | 0.001266 | -1.0092     |
| Q6PD99      | 0.001361 | 0.762697    |
| Q7ZVN9      | 0.001786 | 5.1448      |
| Q6DRC1      | 0.001975 | 1.0806      |
| Q804G7      | 0.002031 | -0.479638   |
| Q7ZUU5      | 0.002345 | 0.905212    |
| Q7ZYX4      | 0.00269  | 0.210278    |
| Q1JPZ7      | 0.002694 | 0.527177    |
| X1WD74      | 0.002859 | 0.957053    |
| Q5TZI1      | 0.002897 | 0.740421    |
| F8W4Q9      | 0.002915 | -0.715132   |
| B0S5S9      | 0.003161 | 1.00585     |
| Q6DBT9      | 0.003202 | 0.686377    |
| Q6PC82      | 0.003687 | -0.591262   |
| Q7SYE1      | 0.003993 | 0.981394    |
| Q7SZC9      | 0.004124 | -1.66381    |
| Q6PBQ4      | 0.004184 | 0.73479     |
| E9QCA9      | 0.004355 | 1.42082     |
| Q804C3      | 0.004622 | 0.54113     |
| F1QUW4      | 0.004741 | 0.814594    |
| A0A2R8RQJ5  | 0.005004 | 0.500837    |
| A8WG05      | 0.005058 | -0.800756   |
| B3DJH0      | 0.005072 | -1.30422    |
| Q6IQQ0      | 0.005082 | -1.84776    |
| Q6DGY4      | 0.005253 | -0.93853    |

|            |          |           |
|------------|----------|-----------|
| Q6AXJ2     | 0.005264 | -0.920406 |
| Q7SXQ3     | 0.00584  | -3.53452  |
| Q90ZM2     | 0.005852 | 0.760472  |
| B8JL35     | 0.006264 | 0.576817  |
| Q6P027     | 0.006418 | -0.948851 |
| Q7ZV04     | 0.006652 | -1.14902  |
| Q6DG71     | 0.006826 | -1.63392  |
| B0S754     | 0.006975 | -0.540343 |
| Q90ZM2     | 0.007239 | -2.96893  |
| Q803J3     | 0.007245 | 0.474805  |
| E9QE47     | 0.007272 | 0.700467  |
| Q801M0     | 0.0073   | -2.03043  |
| B2GSH6     | 0.007691 | -1.12915  |
| Q6P2T0     | 0.007844 | -1.1738   |
| Q6IQ97     | 0.007976 | -1.31667  |
| F1QMZ6     | 0.00826  | 0.892981  |
| Q6PBX8     | 0.008349 | -0.822399 |
| A5WV37     | 0.008488 | 0.811984  |
| Q1LYP4     | 0.008545 | 0.962926  |
| Q6P959     | 0.008691 | -0.820321 |
| Q6PC34     | 0.009116 | 0.845695  |
| Q90WX5     | 0.009118 | -1.14349  |
| Q6TGY8     | 0.009261 | 0.751429  |
| Q9I9E5     | 0.009283 | -1.0516   |
| F1RAV6     | 0.009806 | 1.35714   |
| P17561     | 0.010064 | -2.14753  |
| A0A8M9P7D1 | 0.010204 | 0.927811  |
| Q6PYX3     | 0.010331 | 1.26646   |
| Q567V5     | 0.010536 | 0.564191  |
| Q7SZD2     | 0.010652 | 0.391492  |
| Q4G5V7     | 0.010925 | 1.0493    |
| D7RVS0     | 0.010925 | 0.429207  |
| B0S553     | 0.011947 | 0.717731  |
| Q6P0H1     | 0.012309 | 0.834073  |
| Q5XJT7     | 0.012654 | 0.921172  |
| F6NK19     | 0.012961 | 0.682257  |
| G4XPM3     | 0.013015 | 0.648204  |
| Q5U3R4     | 0.013168 | -1.35827  |
| Q6NWC6     | 0.01337  | 0.753258  |
| Q6DBW5     | 0.013479 | 0.904397  |
| Q7SY50     | 0.014323 | -1.70132  |

|                |          |           |
|----------------|----------|-----------|
| A0A8M1P1<br>82 | 0.01433  | -0.44557  |
| Q5SNP7         | 0.014698 | 1.10813   |
| Q6NWH2         | 0.01483  | 0.689758  |
| F1Q9I7         | 0.014938 | 0.752187  |
| B8A518         | 0.015037 | -0.91227  |
| Q5U369         | 0.015386 | 0.996881  |
| Q6PHE5         | 0.01539  | 0.997368  |
| Q503N6         | 0.015597 | 0.834698  |
| F1QCR7         | 0.015701 | 0.913886  |
| E7FC95         | 0.015893 | -1.49379  |
| Q502L5         | 0.015932 | 0.819911  |
| Q6DGN1         | 0.016077 | -0.470161 |
| A0A2R8RK<br>K2 | 0.016391 | 0.913101  |
| F1QDE7         | 0.016648 | 0.596429  |
| Q803G7         | 0.016773 | 0.605661  |
| Q5XJP7         | 0.01719  | 0.709815  |
| F1Q5B8         | 0.017246 | -1.72005  |
| Q8JHH3         | 0.017291 | -2.04476  |
| O42248         | 0.017431 | -0.343451 |
| F8W4X0         | 0.01804  | -1.81403  |
| A0A8M1NE<br>64 | 0.018124 | -0.923081 |
| Q66L49         | 0.018135 | 0.948545  |
| Q6NWK7         | 0.018146 | -1.06605  |
| Q7ZUD6         | 0.018215 | 0.835702  |
| Q6RKB0         | 0.018704 | 1.39215   |
| Q5U3E5         | 0.019095 | 0.912415  |
| Q8JH72         | 0.019139 | -1.06957  |
| Q4VBK0         | 0.0192   | -1.53365  |
| Q7T341         | 0.019305 | 0.711135  |
| F1R3D3         | 0.019784 | -1.28123  |
| B2GS26         | 0.019955 | 0.786676  |
| A4FUK1         | 0.020276 | 1.20295   |
| Q6PFU0         | 0.020812 | -1.82557  |
| Q1LVM0         | 0.021127 | 0.479118  |
| F8W4E2         | 0.021296 | 1.22339   |
| Q6DGT8         | 0.021298 | -1.0666   |
| Q7T296         | 0.021559 | 0.559891  |
| Q8UVZ4         | 0.021686 | 0.706464  |
| CON_P35<br>527 | 0.021755 | 0.819402  |

|                |          |           |
|----------------|----------|-----------|
| Q6DGS3         | 0.02185  | 0.552607  |
| Q9I8U8         | 0.022048 | 1.22729   |
| Q803L1         | 0.02245  | 0.679484  |
| Q5D018         | 0.022475 | 0.341981  |
| F1QII8         | 0.022878 | 0.595292  |
| Q566S4         | 0.022946 | -0.781161 |
| A7E2L8         | 0.023575 | -1.72753  |
| A5A5E1         | 0.023603 | -0.437627 |
| E7F5G8         | 0.02374  | 0.85531   |
| E7FGW2         | 0.023919 | 0.839511  |
| X1WET9         | 0.024128 | 0.60789   |
| E7FBU7         | 0.024738 | 0.809415  |
| Q6IQK3         | 0.024859 | -0.379822 |
| F6PBX0         | 0.024882 | 1.01335   |
| Q66IB3         | 0.024931 | -1.97329  |
| Q08B95         | 0.025284 | 0.607609  |
| Q803H5         | 0.025368 | -0.478846 |
| Q6P3J5         | 0.02548  | -0.342405 |
| Q6NWI7         | 0.025516 | -1.99737  |
| F1QKW3         | 0.025541 | 0.888355  |
| B0R193         | 0.025913 | 0.675828  |
| Q6AXJ2         | 0.026561 | 0.483077  |
| E7FFL3         | 0.026751 | 0.683697  |
| Q6PBM9         | 0.026821 | 0.365942  |
| F5HSE3         | 0.026872 | 1.37693   |
| Q6PHJ1         | 0.027168 | -1.02579  |
| A5HLY6         | 0.027238 | 0.537177  |
| Q6P0H6         | 0.027449 | 0.285213  |
| Q0P408         | 0.028206 | 0.632262  |
| A4FVL3         | 0.028395 | 0.572223  |
| Q32LR2         | 0.02873  | 0.911809  |
| Q6TNV0         | 0.028779 | 0.63668   |
| A7MBY4         | 0.028987 | -0.920881 |
| U3JAA1         | 0.029106 | 0.78484   |
| F1QPP6         | 0.029141 | 1.07232   |
| Q5TZ35         | 0.029741 | 0.74973   |
| E7EZE6         | 0.030136 | -1.43541  |
| A0A0R4IP1<br>2 | 0.030347 | 0.479474  |
| A2CEA9         | 0.030526 | 0.936813  |
| Q6PBJ9         | 0.030622 | 0.893379  |
| F1QTW8         | 0.030716 | 0.701908  |

|        |          |           |
|--------|----------|-----------|
| Q6Q420 | 0.030796 | 0.848694  |
| Q9DGR5 | 0.030806 | -1.48242  |
| Q7T356 | 0.03086  | -0.602564 |
| Q7ZWJ4 | 0.031077 | -2.71144  |
| Q7SX97 | 0.031287 | 0.821599  |
| Q08BY9 | 0.031438 | 0.713483  |
| Q6DC80 | 0.031539 | -0.88979  |
| A4QN66 | 0.031829 | 0.81361   |
| Q568L3 | 0.03283  | 1.09307   |
| E7F8M1 | 0.032937 | -1.20617  |
| Q7ZUT3 | 0.032972 | 0.722386  |
| Q0R680 | 0.033196 | -0.724326 |
| Q5U3G0 | 0.033329 | 0.96201   |
| Q6DBW7 | 0.033451 | 0.598706  |
| Q802X5 | 0.03365  | -0.566586 |
| Q5RHR9 | 0.034789 | -0.861663 |
| F6P9B5 | 0.035034 | 0.506165  |
| A5A4L9 | 0.035657 | 0.528285  |
| Q503D5 | 0.03579  | 0.861811  |
| Q7T2P3 | 0.035996 | -0.899419 |
| Q1LVE8 | 0.036044 | 1.05433   |
| A2RUZ3 | 0.036188 | 0.565196  |
| F8W2Z3 | 0.036363 | -0.709115 |
| A7E2K5 | 0.036366 | -1.0977   |
| F1Q8W8 | 0.037522 | 0.642242  |
| C5IG48 | 0.037925 | -0.867814 |
| Q6DGE9 | 0.038805 | 0.494877  |
| Q8UUX9 | 0.038886 | 0.923285  |
| O42271 | 0.03978  | 0.776283  |
| Q1LVQ8 | 0.040416 | 0.993941  |
| Q6IQI2 | 0.040487 | 1.01537   |
| Q6P6E0 | 0.040686 | 0.347212  |

|                |          |           |
|----------------|----------|-----------|
| Q5XIZ4         | 0.04114  | 0.773116  |
| Q6NWJ2         | 0.041379 | -0.573219 |
| A8E7T1         | 0.041641 | 3.37243   |
| Q6PBW7         | 0.042433 | 0.446904  |
| X1WCE0         | 0.042587 | 1.13429   |
| F1QKX8         | 0.042624 | 0.709089  |
| E9QG51         | 0.042638 | -1.04685  |
| Q5U3U1         | 0.042803 | 1.00916   |
| A0A8M9PP<br>E1 | 0.043044 | 0.56731   |
| B2GPU7         | 0.043045 | -1.04725  |
| Q5U396         | 0.043053 | 1.18915   |
| E9QFU8         | 0.043186 | 0.804141  |
| Q1LWH1         | 0.043812 | -0.489061 |
| Q4G5T8         | 0.043931 | 1.14432   |
| Q9IAB6         | 0.043991 | 0.986611  |
| Q9MIY5         | 0.044195 | -1.13639  |
| B5DDZ4         | 0.044323 | 0.736048  |
| D5LHQ7         | 0.044385 | 0.609837  |
| Q68EH2         | 0.044392 | -1.00263  |
| O57521         | 0.045903 | -0.411109 |
| CON_P00<br>761 | 0.046359 | -0.968283 |
| B2GSX0         | 0.046508 | 0.669394  |
| Q7T3G2         | 0.046605 | -0.609184 |
| Q5RLN6         | 0.047349 | 0.425562  |
| Q6DH38         | 0.047581 | -1.6536   |
| Q567D7         | 0.047841 | 1.00903   |
| Q6TLF6         | 0.047968 | 1.17672   |
| Q4G5K8         | 0.048197 | 0.927052  |
| I3ITF4         | 0.048443 | -0.886983 |
| D2X2I2         | 0.048705 | -0.864377 |
| Q6IQ59         | 0.048911 | -0.431266 |

130  
131  
132  
133  
134  
135

**Table S8.** All differentially expressed proteins for the homozygous *cyfip2* mutant group (MUT).

| MUT vs. WT  |             |             |            |             |           |
|-------------|-------------|-------------|------------|-------------|-----------|
| Uniprot IDs | P value     | Fold change |            |             |           |
| A5A5E1      | 2.03911E-07 | -5.59564    | P87360     | 0.012459482 | -0.987051 |
| F1QMR9      | 0.00052236  | -5.40953    | Q502L5     | 0.012858491 | 0.655478  |
| Q90ZM2      | 0.000742062 | -2.45573    | E7FC33     | 0.013080972 | 0.876769  |
| Q7ZTS3      | 0.001033618 | -0.989005   | B7ZD02     | 0.013674139 | -1.28274  |
| Q7ZVN9      | 0.001309001 | 4.94043     | Q7ZUI4     | 0.014325177 | -0.989663 |
| Q15I86      | 0.00205608  | 0.460352    | A7E2K4     | 0.014937228 | 0.768817  |
| F8W4E2      | 0.002459291 | 1.17022     | E9QBF1     | 0.015047349 | 1.20558   |
| B8A4S4      | 0.002777218 | 4.23144     | Q7SXX4     | 0.016119442 | 0.659585  |
| Q6IQQ0      | 0.003172488 | -1.1173     | B2GSH6     | 0.016226319 | -1.07757  |
| Q7ZWJ4      | 0.003522735 | -1.72366    | Q9DEU1     | 0.016772199 | -1.48524  |
| Q6PBQ4      | 0.004052005 | 0.758154    | Q8UUX9     | 0.016879128 | 0.927227  |
| D7RVS0      | 0.004280456 | 0.851676    | B8JL35     | 0.017280647 | 0.691652  |
| A0A2R8RZ61  | 0.004334111 | 6.07489     | A7MCQ5     | 0.017463448 | -1.11373  |
| Q8JGR4      | 0.00456983  | -2.09505    | F5HSE3     | 0.017940725 | 1.34055   |
| A2BE76      | 0.00513949  | 0.47299     | A0A0K0F5S9 | 0.017980013 | 0.809795  |
| Q804C3      | 0.005435131 | 0.606574    | E9QCD1     | 0.018926487 | 0.28596   |
| F1QT45      | 0.005818754 | 1.08996     | Q6NX91     | 0.018962692 | -0.991968 |
| Q9MIY1      | 0.006076171 | 1.33827     | B0R1C4     | 0.019269924 | 0.955031  |
| Q6PFU0      | 0.006509086 | -1.64371    | B2GS26     | 0.019459425 | 0.84403   |
| Q6NUW5      | 0.006565231 | -1.61033    | Q7ZUY9     | 0.019565908 | 0.621363  |
| Q4G5V7      | 0.006652732 | 0.824453    | F1QJU0     | 0.01992783  | 0.94014   |
| Q08C47      | 0.006788597 | -0.963854   | U3JAA1     | 0.020536196 | 0.78544   |
| A5WV37      | 0.0072716   | 0.904072    | Q8JHG2     | 0.020872766 | -0.845503 |
| Q5RKM3      | 0.007343617 | -3.00481    | Q567V5     | 0.020991332 | 0.653493  |
| Q6NWK7      | 0.007706373 | -0.855665   | A7E2L8     | 0.023647215 | -1.48568  |
| Q7ZUP6      | 0.009266378 | -0.639457   | Q803G7     | 0.023807292 | 0.605124  |
| B3DJH0      | 0.009579658 | -0.482817   | Q45QT2     | 0.024222    | -2.9438   |
| Q6DG71      | 0.009897374 | -1.26208    | Q803G1     | 0.024300209 | 0.534508  |
| B0UYS0      | 0.010827046 | -1.35404    | A4QN66     | 0.024331563 | 0.850256  |
| Q1L8Q3      | 0.011347495 | 0.816093    | Q7T1R2     | 0.024443872 | -0.816371 |
| B2GRG9      | 0.011405649 | -0.558996   | Q6NSN5     | 0.025136222 | 0.485523  |
| A0N0A7      | 0.01157071  | 0.669225    | Q6TGT0     | 0.026478904 | -1.66869  |
| Q804G9      | 0.011589908 | -0.64098    | Q6PC34     | 0.026535666 | 0.61495   |
| Q9YH92      | 0.011746812 | 0.542367    | Q6DRD6     | 0.027525169 | 0.55623   |
| Q6PBW7      | 0.011936033 | 0.576003    | Q6P271     | 0.027539116 | -1.51148  |
| Q5RZ65      | 0.01204814  | -1.99309    | A5A4L9     | 0.027549264 | 0.453133  |
| Q66HZ3      | 0.012094001 | 0.78498     | Q6RKB0     | 0.027945379 | 1.17807   |
| F1QMZ6      | 0.012444286 | 0.741557    | Q6IMF9     | 0.027991747 | -0.880959 |
|             |             |             | Q7SX97     | 0.028174745 | 0.651189  |
|             |             |             | Q7ZSY3     | 0.028547626 | 0.383965  |

|            |             |           |
|------------|-------------|-----------|
| F1QXB0     | 0.02909913  | -0.58536  |
| A0A8M1NUM0 | 0.030134223 | 0.536331  |
| E7FGU0     | 0.030396949 | -0.564946 |
| E7FBD3     | 0.030633033 | 0.810468  |
| Q6PHJ4     | 0.030688807 | -1.32292  |
| F6NK19     | 0.030819103 | 0.465742  |
| B1WB89     | 0.030951379 | -2.85524  |
| Q5RGQ4     | 0.031226981 | 0.564689  |
| Q7SYI7     | 0.031303291 | 1.08607   |
| Q6P6E0     | 0.032237399 | 0.543235  |
| F1R922     | 0.033585359 | -1.23018  |
| Q7T160     | 0.033845427 | 0.674531  |
| B8JLR6     | 0.035505039 | 0.360222  |
| Q05AP7     | 0.035874842 | -0.8066   |
| Q803G3     | 0.036131833 | -0.96478  |
| Q7ZUP2     | 0.03625434  | -0.551839 |
| A0A0R4ID71 | 0.037442083 | -0.859924 |
| Q08BX5     | 0.037567301 | 0.932148  |
| Q5XJT7     | 0.037568166 | 0.993062  |
| A8E5J3     | 0.037577683 | 0.673695  |
| Q803M8     | 0.037853845 | -0.437536 |
| F1Q6K1     | 0.037923639 | 2.44782   |
| E7F1G8     | 0.039049008 | 0.775294  |
| Q49HM7     | 0.039433924 | -0.583182 |
| Q4VBK0     | 0.039829972 | -1.27735  |

|        |             |           |
|--------|-------------|-----------|
| E9QF63 | 0.041049701 | -1.15528  |
| Q6Q420 | 0.041214497 | 0.796659  |
| B0S5T1 | 0.04128003  | -0.647926 |
| Q08B95 | 0.042082352 | 0.793835  |
| Q6PC82 | 0.042264915 | -0.66847  |
| B8JLV7 | 0.042667775 | 0.69309   |
| Q6TNV0 | 0.043011046 | 0.662924  |
| D2K290 | 0.043024913 | -1.38382  |
| Q1JPZ7 | 0.043664652 | 0.308879  |
| Q6DBW7 | 0.044002768 | 0.492137  |
| Q7ZVF9 | 0.044286361 | -0.697097 |
| Q6DGE9 | 0.044472342 | 0.485659  |
| Q6NYB0 | 0.044772361 | -0.948409 |
| X1WET9 | 0.04550614  | 0.586884  |
| R4GDP5 | 0.045929318 | 0.658113  |
| E7FBU7 | 0.046439764 | 0.566435  |
| Q4V9H6 | 0.046743368 | 0.831491  |
| Q6DGN1 | 0.046922377 | 0.371283  |
| A2VD35 | 0.047314036 | 0.849927  |
| Q7ZVQ3 | 0.047615681 | -0.848595 |
| Q7SXX2 | 0.049150733 | -0.857413 |
| Q9DDE1 | 0.049492569 | 0.910999  |
| F1QUY7 | 0.049811544 | -0.336958 |
| Q6YBS2 | 0.049935569 | -0.368233 |

138  
139  
140  
141  
142  
143  
144  
145  
146  
147  
148  
149  
150

151 **Table S9.** List of canonical pathways activation/inhibition for each genotype and their respective z scores.

| <b>Canonical Pathways</b>                           | <b>HET vs WT</b> | <b>MUT vs WT</b> |
|-----------------------------------------------------|------------------|------------------|
| Neutrophil Extracellular Trap Signaling Pathway     | -2.333           | 0.816            |
| CLEAR Signaling Pathway                             | 1.89             | 1                |
| Oxidative Phosphorylation                           | -0.905           | 1.633            |
| Sirtuin Signaling Pathway                           | 0                | -2.449           |
| MSP-RON Signaling In Cancer Cells Pathway           | -2.236           | N/A              |
| HIPPO signaling                                     | 2.236            | N/A              |
| 14-3-3-mediated Signaling                           | -2.236           | N/A              |
| Estrogen Receptor Signaling                         | -2.121           | N/A              |
| ERK5 Signaling                                      | -2               | N/A              |
| Protein Kinase A Signaling                          | -1.89            | 0                |
| PI3K/AKT Signaling                                  | -1.89            | N/A              |
| Inhibition of ARE-Mediated mRNA Degradation Pathway | -1.633           | N/A              |
| Epithelial Adherens Junction Signaling              | -1.342           | N/A              |
| Calcium Signaling                                   | 1.342            | N/A              |
| AMPK Signaling                                      | 1.342            | N/A              |
| Endocannabinoid Neuronal Synapse Pathway            | -1               | N/A              |
| SNARE Signaling Pathway                             | 1                | N/A              |
| Insulin Secretion Signaling Pathway                 | 0                | 1                |
| Cardiac Hypertrophy Signaling                       | -1               | N/A              |
| Xenobiotic Metabolism CAR Signaling Pathway         | -1               | N/A              |
| EIF2 Signaling                                      | N/A              | -1               |
| G Beta Gamma Signaling                              | -1               | N/A              |
| Spliceosomal Cycle                                  | 0.816            | N/A              |
| Coronavirus Pathogenesis Pathway                    | -0.447           | N/A              |

152
